# Supplementary material for: Fiber fractions, multielemental and isotopic composition of a tropical C4 grass grown under elevated atmospheric carbon dioxide
Source: PeerJ. 2019 Feb 19;7:e5932. doi: 10.7717/peerj.5932 (PMC6385687; doi:10.7717/peerj.5932)
Supplement: Supplemental Information 1 [file peerj-07-5932-s001.xlsx]

## Sheet: Production and Fibre Fractions
Treatment (CO2)	Sample	Portion	FACE	Block	OM	aFDNom	FDAom	LIG	HEMI	CEL	Height	Stem%	Leaf%	Inflor%	Senesc%	FM kgha	DM kgha
Elevated	FP1A	Whole plant	1	1	946.69	638.4	356.18	59.91	282.22	296.27	59.8333	52.2106	35.2332	1.0882	10.6461	33236.8	4377.2
Elevated	FP1B	Whole plant	1	1	935.48	643.89	346.42	61.03	297.47	285.39	61.8333	36.3889	45.2775	1.42217	22.5846	18299.6	6718.8
Control	FP2A	Whole plant	2	1	943.27	680.03	399.89	67.96	280.14	331.93	62.8333	50.1846	38.7863	1.52284	12.9153	43338	6757.2
Control	FP2B	Whole plant	2	1	932.24	686.67	341.69	85.78	344.98	255.91	48	36.5597	34.2852	2.41766	35.1697	27106.8	5668.8
Control	FP3A	Whole plant	3	2	944.09	685.37	392.67	73.39	292.7	319.28	67	55.8009	31.196	5.38781	18.7755	66139.2	9522
Control	FP3B	Whole plant	3	2	945.63	677.36	401.28	71.38	276.08	329.9	61.3333	48.4433	30.7752	4.42498	23.8359	23413.2	4997.2
Elevated	FP4A	Whole plant	4	2	941.95	638.55	353.32	73.33	285.23	279.99	54	38.0618	36.8764	2.3412	29.1218	28984	3338.8
Elevated	FP4B	Whole plant	4	2	940.64	619.28	328.36	72.01	290.92	256.35	19.6667	46.0556	56.5435	15.5495	39.7629	5329.6	507.2
Elevated	FP5A	Whole plant	5	3	950.52	702.16	409.78	95.13	292.38	314.65	55.6667	49.238	34.257	1.99169	16.9034	26902.8	3956.4
Elevated	FP5B	Whole plant	5	3	936.62	687.02	368.07	81.36	318.95	286.71	39.3333	42.1493	38.6391	4.52275	19.0225	16533.2	1540.8
Control	FP6A	Whole plant	6	3	947.23	647.58	379.01	73.48	268.57	305.53	55	61.6756	43.1887	2.36004	19.7194	17725.2	2582.8
Control	FP6B	Whole plant	6	3	947.26	668.13	380.2	68.43	287.93	311.77	63.3333	34.0106	51.9098	0.0609508	19.3011	26121.6	4983.6
Control	FP7A	Whole plant	7	4	952.81	704	409.19	82.23	294.81	326.96	63.3333	74.7447	41.0973	5.88235	25.3187	15512.4	7260.4
Control	FP7B	Whole plant	7	4	948.63	722.08	458.91	97.12	263.17	361.79	67.6667	53.8509	27.0171	3.8072	16.591	25283.6	6507.2
Elevated	FP8A	Whole plant	8	4	936.07	664.62	386.04	73.75	278.58	312.29	65.8333	48.5871	27.2313	3.2252	26.2421	51336.4	8586.8
Elevated	FP8B	Whole plant	8	4	952.84	699.82	400.83	75.46	298.99	325.37	69.5	47.1561	41.7936	2.83093	15.3651	10302	5535.2
Control	FP9A	Whole plant	9	5	954.34	732.41	470.49	103.85	261.92	366.64	71.5	38.435	31.3433	4.65879	27.9355	35753.6	8249.2
Control	FP9B	Whole plant	9	5	946.79	634.18	354.04	76.94	280.14	277.1	65.1667	51.9725	34.508	4.75973	16.4851	25496	4141.2
Elevated	FP10A	Whole plant	10	5	952.89	709.1	421.79	92.57	287.31	329.22	52	42.1438	30.7632	4.21083	24.5679	29103.6	4809.6
Elevated	FP10B	Whole plant	10	5	947.89	681.98	399.79	73.63	282.19	326.16	43.3333	44.3783	42.161	2.32193	15.6191	32694.8	4752.4
Elevated	FP11A	Whole plant	11	6	947.02	708.02	427.04	88.72	280.98	338.32	61	53.8137	37.6894	2.41033	16.2713	26970.4	6620.8
Elevated	FP11B	Whole plant	11	6	944.24	670.5	397.38	82.48	273.12	314.9	62.6667	35.7673	48.7139	3.84645	16.7305	41492	4569.6
Control	FP12A	Whole plant	12	6	937.21	697.43	411.46	87.02	285.97	324.44	55.5	37.6131	49.8389	0.644558	11.654	26098.8	4843.6
Control	FP12B	Whole plant	12	6	941.12	656.31	383.01	89.94	273.3	293.07	41.3333	39.1634	48.6095	0	14.4564	11902.4	2341.2
Elevated	FP1A	Leaf	1	1	941.12	526.13	263.83	38.38	262.3	225.45
Elevated	FP1B	Leaf	1	1	938.11	534.86	288.46	50.87	246.4	237.59
Control	FP2A	Leaf	2	1	937.02	546.55	267.87	54.46	278.68	213.41
Control	FP2B	Leaf	2	1	929.07	516.71	250.89	37.75	265.82	213.14
Control	FP3A	Leaf	3	2	935.44	533.55	269.18	60.45	264.37	208.73
Control	FP3B	Leaf	3	2	938.66	509.6	260.19	41.79	249.41	218.4
Elevated	FP4A	Leaf	4	2	945.24	538.46	252.22	83.2	286.24	169.02
Elevated	FP4B	Leaf	4	2	941.05	584.97	273.89	57.2	311.08	216.69
Elevated	FP5A	Leaf	5	3	939.54	574.83	260.65	83.98	314.18	176.67
Elevated	FP5B	Leaf	5	3	946.67	562.66	272.81	56.35	289.85	216.46
Control	FP6A	Leaf	6	3	942.08	554.27	272.33	78.18	281.94	194.15
Control	FP6B	Leaf	6	3	945.32	597.71	290.39	74.66	307.32	215.73
Control	FP7A	Leaf	7	4	944.73	571.19	297.92	78.51	273.27	219.41
Control	FP7B	Leaf	7	4	937.49	572.4	285.65	54.86	286.75	230.79
Elevated	FP8A	Leaf	8	4	951.87	571.31	272.13	44.74	299.18	227.39
Elevated	FP8B	Leaf	8	4	941.81	553.99	287.47	63.3	266.52	224.17
Control	FP9A	Leaf	9	5	941.94	564.38	282.73	64.26	281.65	218.47
Control	FP9B	Leaf	9	5	947.57	557.33	266.79	56.74	290.54	210.05
Elevated	FP10A	Leaf	10	5	940.48	566.08	291.47	75.05	274.61	216.42
Elevated	FP10B	Leaf	10	5	939.03	580	292.73	70.23	287.27	222.5
Elevated	FP11A	Leaf	11	6	941.32	564.48	279.39	95.62	285.09	183.77
Elevated	FP11B	Leaf	11	6	941.61	611.5	322.45	91.91	289.05	230.54
Control	FP12A	Leaf	12	6	936.99	561.07	265.3	104.3	295.77	161
Control	FP12B	Leaf	12	6	937.69	576.39	289.75	62.52	286.64	227.23
Elevated	FP1A	Stem	1	1	950.61	740.71	471.8	91.04	268.91	380.76
Elevated	FP1B	Stem	1	1	958.49	739	451.07	83.12	287.93	367.95
Control	FP2A	Stem	2	1	947.08	742.94	483.88	92.28	259.06	391.6
Control	FP2B	Stem	2	1	947.91	768.91	486.41	100.84	282.5	385.57
Control	FP3A	Stem	3	2	956.84	794.25	510.45	125.13	283.8	385.32
Control	FP3B	Stem	3	2	963.43	767.29	511.23	129.81	256.06	381.42
Elevated	FP4A	Stem	4	2	953.84	766.35	466.29	114.62	300.06	351.67
Elevated	FP4B	Stem	4	2	959.19	747.92	447.32	102.22	300.6	345.1
Elevated	FP5A	Stem	5	3	955.32	807.24	521.14	118.73	286.1	402.41
Elevated	FP5B	Stem	5	3	958.32	768.03	476.83	98.92	291.2	377.91
Control	FP6A	Stem	6	3	954.76	772.04	488.98	127.41	283.06	361.57
Control	FP6B	Stem	6	3	966.43	809.17	520.62	123.15	288.55	397.47
Control	FP7A	Stem	7	4	965.4	786.16	497.98	86.45	288.18	411.53
Control	FP7B	Stem	7	4	959.75	796.13	523.99	97.92	272.14	426.07
Elevated	FP8A	Stem	8	4	969.45	800.18	524.05	98.37	276.13	425.68
Elevated	FP8B	Stem	8	4	962.06	782.63	504.89	92.06	277.74	412.83
Control	FP9A	Stem	9	5	957.22	794.8	508.98	100.92	285.82	408.06
Control	FP9B	Stem	9	5	957.88	787.97	482.26	133.58	305.71	348.68
Elevated	FP10A	Stem	10	5	958.08	745.15	469.33	79.66	275.82	389.67
Elevated	FP10B	Stem	10	5	961.02	808.81	528.62	313.73	280.19	214.89
Elevated	FP11A	Stem	11	6	948.9	773.77	504.69	124.63	269.08	380.06
Elevated	FP11B	Stem	11	6	959.17	803.27	534.27	107.69	269	426.58
Control	FP12A	Stem	12	6	952.44	743.88	441.54	67.89	302.34	373.65
Control	FP12B	Stem	12	6	959.51	772.5	492.35	103.46	280.15	388.89
Elevated	FP1A	Senesc	1	1	899.85	712.71	452.45	115.79	260.26	336.66
Elevated	FP1B	Senesc	1	1	935.29	760.82	493.54	107.09	267.28	386.45
Control	FP2A	Senesc	2	1	923.73	723.01	450.7	93.91	272.31	356.79
Control	FP2B	Senesc	2	1	934.37	767.94	532.86	128.03	235.08	404.83
Control	FP3A	Senesc	3	2	918.95	748.23	456.8	92.68	291.43	364.12
Control	FP3B	Senesc	3	2	943.23	760.34	486.94	90.03	273.4	396.91
Elevated	FP4A	Senesc	4	2	928.4	716.45	451.34	98.73	265.11	352.61
Control	FP9B	Senesc	9	5	935.53	735.05	419.91	88.72	315.14	331.19
Elevated	FP5A	Senesc	5	3	929.78	731.34	437.88	82.24	293.46	355.64
Elevated	FP5B	Senesc	5	3	904.27	699.12	410.5	87.53	288.62	322.97
Control	FP6A	Senesc	6	3	934.51	751.34	473.43	87.44	277.91	385.99
Control	FP6B	Senesc	6	3	927.3	720.38	404.55	67.54	315.83	337.01
Control	FP7A	Senesc	7	4	931.77	723.93	437.78	77.46	286.15	360.32
Control	FP7B	Senesc	7	4	927.27	735.39	430.89	77.93	304.5	352.96
Elevated	FP8A	Senesc	8	4	943.49	737.21	450.18	79.61	287.03	370.57
Elevated	FP8B	Senesc	8	4	942.03	751.9	474.49	115.42	277.41	359.07
Control	FP9A	Senesc	9	5	942.27	740.65	470.34	88.49	270.31	381.85
Elevated	FP10A	Senesc	10	5	932.57	730.74	445.36	93.67	285.38	351.69
Elevated	FP10B	Senesc	10	5	922.38	722.29	420.99	83.67	301.3	337.32
Elevated	FP11A	Senesc	11	6	932.81	755.52	452.17	87.58	303.35	364.59
Elevated	FP11B	Senesc	11	6	936.57	725.35	432.38	88.73	292.97	343.65
Control	FP12A	Senesc	12	6	908.89	712.9	449.19	103.51	263.71	345.68
Control	FP12B	Senesc	12	6	926	735.7	457.74	104.12	277.96	353.62

## Sheet: S P Fe Mn K Ca N C 13C 15N CN
Treatment (CO2)	Sample	Portion	FACE	Block	S	P	Fe	Mn	K	Ca	N	C	%S	%P	%Fe	%Mn	%K	%Ca	15N(%o)	%N	13C(%o)	%C	C/N
Elevated	FP1A	Leaf	1	1	1722.49	916.587	224.226	98.513	15070.2	3721.37	30727	434960	0.172249	0.0916587	0.0224226	0.0098513	1.50702	0.372137	4.81	3.0727	-15.416	43.496	14.1556
Elevated	FP1B	Leaf	1	1	1550.41	1098.04	165.42	139.209	20400.9	3588.3	29451.7	438270	0.155041	0.109804	0.016542	0.0139209	2.04009	0.35883	4.644	2.94517	-15.495	43.827	14.881
Control	FP2A	Leaf	2	1	1746	1070.85	163.234	85.638	19978.7	4010.91	27785.3	431637	0.1746	0.107085	0.0163234	0.0085638	1.99787	0.401091	4.024	2.77853	-14.067	43.1637	15.5347
Control	FP2B	Leaf	2	1	1781.38	1274.21	228.296	110.796	22804.5	3660.72	29703	426096	0.178139	0.127421	0.0228296	0.0110796	2.28045	0.366071	4.289	2.9703	-13.947	42.6096	14.3452
Control	FP3A	Leaf	3	2	1819.81	1190.72	229.406	74.241	17893.6	4853.01	26897.8	439635	0.181981	0.119072	0.0229406	0.0074241	1.78936	0.485301	4.638	2.68978	-13.862	43.9635	16.3447
Control	FP3B	Leaf	3	2	1656.67	1148.95	170.803	48.575	12818.2	5657.66	21005.5	430647	0.165667	0.114895	0.0170803	0.0048575	1.28182	0.565766	4.3625	2.10055	-14.6855	43.0647	20.7471
Elevated	FP4A	Leaf	4	2	1805.85	1098.82	161.308	70.479	17469.2	3838.58	31136	443357	0.180585	0.109882	0.0161308	0.0070479	1.74692	0.383858	4.431	3.1136	-15.352	44.3357	14.2393
Elevated	FP4B	Leaf	4	2	1868.94	1371.5	485.353	57.517	16553.8	3769.88	29983.7	439151	0.186894	0.13715	0.0485353	0.0057517	1.65538	0.376988	4.288	2.99837	-15.248	43.9151	14.6463
Elevated	FP5A	Leaf	5	3	1523	739.78	183.299	96.534	15641.7	4403.01	27540.4	433758	0.1523	0.073978	0.0183299	0.0096534	1.56417	0.440301	3.928	2.75404	-15.237	43.3758	15.7499
Elevated	FP5B	Leaf	5	3	1636.04	649.083	178.037	143.815	18273.4	3471.61	27873.2	445923	0.163604	0.0649083	0.0178037	0.0143815	1.82734	0.347161	4.224	2.78732	-15.677	44.5923	15.9983
Control	FP6A	Leaf	6	3	1717.36	876.371	191.114	86.117	21182	3801.14	29556.1	444797	0.171736	0.0876371	0.0191114	0.0086117	2.1182	0.380114	3.599	2.95561	-14.152	44.4797	15.0493
Control	FP6B	Leaf	6	3	1761.66	1559.44	219.663	67.154	19419.8	3016.54	30179.3	432913	0.176166	0.155944	0.0219663	0.0067154	1.94198	0.301654	4.682	3.01793	-14.299	43.2913	14.3447
Control	FP7A	Leaf	7	4	1642.05	897.887	186.762	111.836	19371.3	4612.24	25449.4	437945	0.164205	0.0897887	0.0186762	0.0111836	1.93713	0.461224	4	2.54494	-14.196	43.7945	17.2084
Control	FP7B	Leaf	7	4	1695.04	861.173	266.671	160.582	18452.6	5398.76	26064.9	422858	0.169504	0.0861173	0.0266671	0.0160582	1.84526	0.539876	4.236	2.60649	-14.055	42.2858	16.2233
Elevated	FP8A	Leaf	8	4	1553.52	697.884	173.582	103.925	19377.5	3286.66	28457.7	437396	0.155352	0.0697884	0.0173582	0.0103925	1.93775	0.328666	4.197	2.84577	-15.845	43.7396	15.37
Elevated	FP8B	Leaf	8	4	1654.39	1095.55	170.254	108.771	18097.3	4594.2	25324.2	424932	0.165439	0.109555	0.0170254	0.0108771	1.80973	0.45942	5.113	2.53242	-15.563	42.4932	16.7797
Control	FP9A	Leaf	9	5	1592.7	840.299	225.243	143.935	19647.5	4516.65	28896.3	436581	0.15927	0.0840299	0.0225243	0.0143935	1.96475	0.451665	3.649	2.88963	-14.334	43.6581	15.1086
Control	FP9B	Leaf	9	5	1518.84	796.456	163.938	145.919	15370.5	3915.64	29144.5	438848	0.151884	0.0796456	0.0163938	0.0145919	1.53705	0.391564	4.603	2.91445	-14.238	43.8848	15.0577
Elevated	FP10A	Leaf	10	5	1674.3	1241.11	165.77	128.562	20468.9	3951.96	30430.4	434218	0.16743	0.124111	0.016577	0.0128562	2.04689	0.395196	4.707	3.04304	-15.48	43.4218	14.269
Elevated	FP10B	Leaf	10	5	1621.99	993.115	225.702	106.39	16987.4	4158.04	25368.5	440415	0.162199	0.0993115	0.0225702	0.010639	1.69874	0.415804	5.248	2.53685	-15.39	44.0415	17.3607
Elevated	FP11A	Leaf	11	6	1671.11	866.53	151.883	130.944	20992.8	3086.71	29583.6	441524	0.167111	0.086653	0.0151883	0.0130944	2.09928	0.308671	4.762	2.95836	-14.991	44.1524	14.9246
Elevated	FP11B	Leaf	11	6	1577.87	985.384	297.174	122.475	19681.5	3371.87	25457.5	437005	0.157787	0.0985384	0.0297174	0.0122475	1.96815	0.337187	5.221	2.54575	-15.471	43.7005	17.166
Control	FP12A	Leaf	12	6	1819.93	1104.15	233.492	142.734	19411.6	4298.78	30854.7	450057	0.181993	0.110415	0.0233492	0.0142734	1.94116	0.429878	3.761	3.08547	-13.621	45.0057	14.5863
Control	FP12B	Leaf	12	6	1660.37	1018.43	287.381	104.073	19437.7	3859.33	27938.5	426437	0.166037	0.101843	0.0287381	0.0104073	1.94377	0.385933	4.317	2.79385	-14.014	42.6437	15.2634
Elevated	FP1A	Stem	1	1	1275.63	723.622	160.722	117.864	16113.7	1403.25	16804.3	410863	0.127563	0.0723622	0.0160722	0.0117864	1.61137	0.140325	4.973	1.68043	-15.265	41.0863	24.4499
Elevated	FP1B	Stem	1	1	1206.96	922.053	143.078	124.893	21238.5	1367.39	14062.1	413498	0.120696	0.0922053	0.0143078	0.0124893	2.12385	0.136739	5.141	1.40621	-14.813	41.3498	29.4052
Control	FP2A	Stem	2	1	1164.55	745.5	83.752	88.74	19739.6	1192.46	15110.7	403666	0.116455	0.07455	0.0083752	0.008874	1.97396	0.119246	3.957	1.51107	-13.44	40.3666	26.714
Control	FP2B	Stem	2	1	1344.14	714.05	92.702	101.89	19731.4	1246.57	15941	408715	0.134414	0.071405	0.0092702	0.010189	1.97314	0.124657	4.776	1.5941	-13.462	40.8715	25.6392
Control	FP3A	Stem	3	2	1128.01	683.778	130.989	55.058	17402.2	1289.55	13520.7	416496	0.112801	0.0683778	0.0130989	0.0055058	1.74022	0.128954	5.1365	1.35207	-13.373	41.6496	30.8094
Control	FP3B	Stem	3	2	979.313	648.587	62.447	49.19	11139.4	1517.03	12028.9	420119	0.0979313	0.0648587	0.0062447	0.004919	1.11394	0.151703	3.983	1.20289	-13.611	42.0119	34.9259
Elevated	FP4A	Stem	4	2	1357.22	1015.87	124.919	75.809	18331.4	1340.44	18231.5	414775	0.135722	0.101587	0.0124919	0.0075809	1.83314	0.134044	4.559	1.82315	-14.612	41.4775	22.7505
Elevated	FP4B	Stem	4	2	1237.13	836.048	127.195	44.08	16778	1090.33	14655.4	423081	0.123713	0.0836048	0.0127195	0.004408	1.6778	0.109033	4.917	1.46554	-14.196	42.3081	28.8686
Elevated	FP5A	Stem	5	3	950.884	514.192	54.191	81.83	14829.3	1245.85	13964.9	418160	0.0950884	0.0514192	0.0054191	0.008183	1.48293	0.124585	4.179	1.39649	-14.478	41.816	29.9436
Elevated	FP5B	Stem	5	3	923.801	693.58	119.841	52.485	18871.7	727.75	13383.4	415845	0.0923801	0.069358	0.0119841	0.0052485	1.88717	0.072775	5.697	1.33834	-14.023	41.5845	31.0717
Control	FP6A	Stem	6	3	1067.45	529.686	72.207	82.512	20889.1	1062.1	15259.3	420682	0.106745	0.0529686	0.0072207	0.0082512	2.08891	0.10621	4.179	1.52593	-13.611	42.0682	27.5689
Control	FP6B	Stem	6	3	1110.96	498.542	80.923	54.496	11269.2	1282.08	12636.8	406245	0.111096	0.0498542	0.0080923	0.0054496	1.12692	0.128208	3.562	1.26368	-13.536	40.6245	32.1479
Control	FP7A	Stem	7	4	961.166	451.063	88.511	94.438	15308.8	1162.99	12112.5	422771	0.0961166	0.0451063	0.0088511	0.0094438	1.53088	0.116299	4.199	1.21125	-13.423	42.2771	34.9037
Control	FP7B	Stem	7	4	903.688	375.153	105.346	111.201	17343.3	1155.62	12436.7	417260	0.0903688	0.0375153	0.0105346	0.0111201	1.73433	0.115562	4.276	1.24367	-13.526	41.726	33.5508
Elevated	FP8A	Stem	8	4	1002.55	380.974	78.139	93.336	17312	931.322	14701	424940	0.100255	0.0380974	0.0078139	0.0093336	1.7312	0.0931322	3.995	1.4701	-15.1835	42.494	28.9083
Elevated	FP8B	Stem	8	4	1008.67	604.013	71.538	83.326	13479.4	1154.03	11097.2	417885	0.100867	0.0604013	0.0071538	0.0083326	1.34794	0.115403	4.477	1.10972	-14.856	41.7885	37.6569
Control	FP9A	Stem	9	5	928.317	394.469	150.831	134.677	16745.7	1542.25	14096.5	408961	0.0928317	0.0394469	0.0150831	0.0134677	1.67457	0.154225	3.766	1.40965	-13.671	40.8961	29.0115
Control	FP9B	Stem	9	5	1039.27	571.067	115.197	127.167	14678.3	1633.86	14775.3	417890	0.103927	0.0571067	0.0115197	0.0127167	1.46783	0.163386	5.355	1.47753	-14.904	41.789	28.2831
Elevated	FP10A	Stem	10	5	1021.98	720.357	81.952	100.853	19803.6	1119.8	14646.2	408139	0.102198	0.0720357	0.0081952	0.0100853	1.98036	0.11198	5.222	1.46462	-14.562	40.8139	27.8665
Elevated	FP10B	Stem	10	5	1039.15	465.933	136.007	105.631	12783.7	1568.92	11532.4	416283	0.103915	0.0465933	0.0136007	0.0105631	1.27837	0.156892	4.75	1.15324	-14.901	41.6283	36.0969
Elevated	FP11A	Stem	11	6	1265.64	619.453	103.725	140.539	21866.8	1519.21	17174	408336	0.126564	0.0619453	0.0103725	0.0140539	2.18668	0.151921	4.774	1.7174	-14.786	40.8336	23.7764
Elevated	FP11B	Stem	11	6	1029.09	418.713	73.139	115.156	15539.7	1434.13	11462	416116	0.102909	0.0418713	0.0073139	0.0115156	1.55397	0.143413	5.456	1.1462	-15.072	41.6116	36.304
Control	FP12A	Stem	12	6	1328.07	833.284	102.97	138.969	18859.4	1432.37	17833.7	405848	0.132807	0.0833284	0.010297	0.0138969	1.88594	0.143237	3.726	1.78337	-13.341	40.5848	22.7574
Control	FP12B	Stem	12	6	1113.33	698.427	145.433	106.692	16125.6	1293.5	16240.3	413631	0.111333	0.0698427	0.0145433	0.0106692	1.61256	0.12935	3.724	1.62403	-13.498	41.3631	25.4694
Elevated	FP1A	Senesc	1	1	1273.51	.	1643.05	172.824	11486.1	5414.38	15288.5	378719	0.127351	.	0.164305	0.0172824	1.14861	0.541438	4.966	1.52885	-19.031	37.8719	24.7714
Elevated	FP1B	Senesc	1	1	1173.01	488.392	359.351	191.533	13388.8	4548.9	11799.6	409182	0.117301	0.0488392	0.0359351	0.0191533	1.33888	0.45489	5.172	1.17996	-16.271	40.9182	34.6777
Control	FP2A	Senesc	2	1	1294.34	680.328	680.261	113.627	10058.4	5443.61	12269.7	404533	0.129434	0.0680328	0.0680261	0.0113627	1.00584	0.544361	3.802	1.22697	-13.54	40.4533	32.9699
Control	FP2B	Senesc	2	1	1205.61	539.297	429.137	107.242	12446.1	5154.77	12710.7	408314	0.120561	0.0539297	0.0429137	0.0107242	1.24461	0.515477	5.16	1.27107	-15.38	40.8314	32.1351
Control	FP3A	Senesc	3	2	1235.1	694.093	657.955	114.897	11784.1	5702.33	12332.4	399374	0.12351	0.0694093	0.0657955	0.0114897	1.17841	0.570233	4.474	1.23324	-13.457	39.9374	32.3843
Control	FP3B	Senesc	3	2	1121.49	304.527	331.941	175.059	12475	4215.1	12227.3	414195	0.112149	0.0304527	0.0331941	0.0175059	1.2475	0.42151	5.196	1.22273	-15.984	41.4195	33.8746
Elevated	FP4A	Senesc	4	2	1235.65	1038.08	753.545	95.195	16814.2	3860.24	16571.4	401688	0.123565	0.103808	0.0753545	0.0095195	1.68142	0.386024	4.619	1.65714	-17.182	40.1688	24.2399
Control	FP9B	Senesc	9	5	1328.07	463.805	913.345	220.236	10601.6	5005.56	14883.4	413310	0.132807	0.0463805	0.0913345	0.0220236	1.06016	0.500556	4.682	1.48834	-14.078	41.331	27.7698
Elevated	FP5A	Senesc	5	3	1164.25	493.699	416.727	99.362	11498.2	3895.86	11842.1	414592	0.116425	0.0493699	0.0416727	0.0099362	1.14982	0.389586	3.905	1.18421	-15.358	41.4592	35.01
Elevated	FP5B	Senesc	5	3	1312.37	.	1677.63	76.838	7691.64	4253.43	14568.4	385770	0.131237	.	0.167763	0.0076838	0.769164	0.425343	4.942	1.45684	-14.981	38.577	26.4799
Control	FP6A	Senesc	6	3	1248.18	575.254	598.205	137.225	15518.6	4818.85	11958.1	406590	0.124818	0.0575254	0.0598205	0.0137225	1.55186	0.481885	4.458	1.19581	-13.67	40.659	34.0011
Control	FP6B	Senesc	6	3	1339.63	578.969	387.719	58.913	10150	5944.88	12884	411444	0.133963	0.0578969	0.0387719	0.0058913	1.015	0.594488	4.629	1.2884	-13.533	41.1444	31.9345
Control	FP7A	Senesc	7	4	1054.01	369.273	299.299	236.115	13369.4	7326.17	9768.3	409769	0.105401	0.0369273	0.0299299	0.0236115	1.33694	0.732617	4.372	0.97683	-13.559	40.9769	41.9488
Control	FP7B	Senesc	7	4	1137.23	.	766.93	198.402	13416.8	5465.57	9722.41	397788	0.113723	.	0.076693	0.0198402	1.34168	0.546557	5.6965	0.972241	-13.639	39.7788	40.9247
Elevated	FP8A	Senesc	8	4	1152.77	.	210.071	169.022	12948.9	4021.61	11687.1	418678	0.115277	.	0.0210071	0.0169022	1.29489	0.402161	5.794	1.16871	-15.97	41.8678	35.824
Elevated	FP8B	Senesc	8	4	1284.67	576.553	208.32	111.863	11712	5369.39	11774.9	409659	0.128467	0.0576553	0.020832	0.0111863	1.1712	0.536939	4.474	1.17749	-16.039	40.9659	34.7908
Control	FP9A	Senesc	9	5	1142.91	441.493	319.323	190.639	14242.8	4892.82	13098.7	419667	0.114291	0.0441493	0.0319323	0.0190639	1.42428	0.489282	4.457	1.30987	-13.949	41.9667	32.0388
Elevated	FP10A	Senesc	10	5	1318.02	916.807	367.911	157.716	16439.5	3733.31	14747.5	413414	0.131802	0.0916807	0.0367911	0.0157716	1.64395	0.373331	5.015	1.47475	-15.976	41.3414	28.0328
Elevated	FP10B	Senesc	10	5	1310.73	368.904	446.83	152.392	12192.7	4716.04	11518	404521	0.131073	0.0368904	0.044683	0.0152392	1.21927	0.471604	5.481	1.1518	-15.927	40.4521	35.1206
Elevated	FP11A	Senesc	11	6	1297.16	399.145	274.708	237.845	13888.6	4536.54	13093.7	420727	0.129716	0.0399145	0.0274708	0.0237845	1.38886	0.453654	5.644	1.30937	-16.632	42.0727	32.132
Elevated	FP11B	Senesc	11	6	1408.27	559.216	296.73	162.829	13958.5	4822.11	13100.8	402459	0.140827	0.0559216	0.029673	0.0162829	1.39585	0.482211	5.796	1.31008	-16.139	40.2459	30.7202
Control	FP12A	Senesc	12	6	1510.11	697.535	1210.8	184.113	12775.9	5470.43	15966.1	403190	0.15101	0.0697535	0.12108	0.0184113	1.27759	0.547042	4.868	1.59661	-14.631	40.319	25.2529
Control	FP12B	Senesc	12	6	1243.45	490.128	393.691	169.386	8192.49	5992.81	12604.2	410782	0.124345	0.0490128	0.0393691	0.0169386	0.819249	0.599281	3.808	1.26042	-13.981	41.0782	32.6028
Elevated	FP1A	Whole plant	1	1	1645.22	988.998	369.289	135.576	15707	3177.66	24042.6	445411	0.164522	0.0988998	0.0369289	0.0135576	1.5707	0.317766	4.623	2.40426	-15.498	44.5411	18.5259
Elevated	FP1B	Whole plant	1	1	1779.43	1104.97	725.837	85.633	12882.1	3560.45	24538.7	425153	0.177943	0.110497	0.0725837	0.0085633	1.28821	0.356045	4.282	2.45387	-15.377	42.5153	17.3258
Control	FP2A	Whole plant	2	1	1339.59	734.725	292.812	105.625	17832.5	2803.62	17924.6	432946	0.133959	0.0734725	0.0292812	0.0105625	1.78325	0.280362	4.144	1.79246	-13.524	43.2946	24.1538
Control	FP2B	Whole plant	2	1	1336.12	734.26	532.822	101.159	15443.2	3331.49	19041.8	427601	0.133612	0.073426	0.0532822	0.0101159	1.54432	0.333149	4.42	1.90418	-13.53	42.7601	22.4559
Control	FP3A	Whole plant	3	2	1385.44	885.491	135.958	75.518	16346.4	2648.66	18816	434971	0.138544	0.0885491	0.0135958	0.0075518	1.63464	0.264867	4.867	1.8816	-13.509	43.4971	23.117
Control	FP3B	Whole plant	3	2	1326.99	1021.08	305.183	51.585	12544.5	3594.77	17153.6	428135	0.132699	0.102108	0.0305183	0.0051585	1.25445	0.359477	4.619	1.71536	-13.811	42.8135	24.9589
Elevated	FP4A	Whole plant	4	2	1347.63	638.258	241.264	105.879	17631.1	3206.99	21463.8	413686	0.134764	0.0638258	0.0241264	0.0105879	1.76311	0.320699	3.083	2.14638	-13.784	41.3686	19.2737
Elevated	FP4B	Whole plant	4	2	1652.91	1108.66	480.851	90.503	14206.1	3911.51	25534.7	432369	0.165291	0.110866	0.0480851	0.0090503	1.42061	0.391151	4.116	2.55347	-14.348	43.2369	16.9326
Elevated	FP5A	Whole plant	5	3	1274.54	687.602	227.141	91.805	16471.2	2968.31	20128.7	417377	0.127454	0.0687602	0.0227141	0.0091805	1.64712	0.296831	3.959	2.01287	-14.945	41.7377	20.7354
Elevated	FP5B	Whole plant	5	3	1253.61	854.576	327.13	97.21	14054.5	3366.13	22034.1	428583	0.125361	0.0854576	0.032713	0.009721	1.40545	0.336613	4.7885	2.20341	-14.42	42.8583	19.4514
Control	FP6A	Whole plant	6	3	1427.81	829.27	199.941	93.202	16409.9	2886.21	24675	418388	0.142781	0.082927	0.0199941	0.0093202	1.64099	0.288621	5.084	2.4675	-15.257	41.8388	16.956
Control	FP6B	Whole plant	6	3	4133.59	.	108.606	26.267	2668.1	866.123	18092.9	433825	0.413359	.	0.0108606	0.0026267	0.26681	0.0866123	4.085	1.80929	-13.804	43.3825	23.9776
Control	FP7A	Whole plant	7	4	1105.16	473.654	160.463	106.842	14617.7	2663.02	17337.1	433871	0.110516	0.0473654	0.0160463	0.0106842	1.46177	0.266302	3.75	1.73371	-13.81	43.3871	25.0256
Control	FP7B	Whole plant	7	4	1152.76	634.755	240.093	114.076	15551.1	2412.12	16303.8	425309	0.115276	0.0634755	0.0240093	0.0114076	1.55511	0.241212	4.31	1.63038	-13.568	42.5309	26.0864
Elevated	FP8A	Whole plant	8	4	1623	944.654	539.132	78.581	12797.6	2909.04	24134.5	418240	0.1623	0.0944654	0.0539132	0.0078581	1.27976	0.290904	4.581	2.41345	-15.261	41.824	17.3295
Elevated	FP8B	Whole plant	8	4	1085.85	617.109	84.766	81.182	12847.5	2275.47	13472.5	378922	0.108585	0.0617109	0.0084766	0.0081182	1.28475	0.227547	4.988	1.34725	-15.182	37.8922	28.1256
Control	FP9A	Whole plant	9	5	1012.81	388.624	160.343	121.96	16494	2709.59	16505.5	434626	0.101281	0.0388624	0.0160343	0.012196	1.6494	0.270959	4.063	1.65055	-13.649	43.4626	26.3323
Control	FP9B	Whole plant	9	5	1289.57	494.92	196.122	167.349	13584.4	2993.27	21474.2	446204	0.128957	0.049492	0.0196122	0.0167349	1.35844	0.299327	4.493	2.14742	-13.94	44.6204	20.7786
Elevated	FP10A	Whole plant	10	5	1049.57	629.481	142.866	106.73	18411.1	1950.91	17543.1	421764	0.104957	0.0629481	0.0142866	0.010673	1.84111	0.195092	5.039	1.75431	-15.529	42.1764	24.0416
Elevated	FP10B	Whole plant	10	5	1419.77	718.576	241.081	111.794	17362.9	2626.09	19182.8	433428	0.141977	0.0718576	0.0241081	0.0111794	1.73629	0.262609	4.3945	1.91828	-15.262	43.3428	22.6197
Elevated	FP11A	Whole plant	11	6	1409.22	648.194	194.838	161.765	20039.7	1954.46	21508.5	421320	0.140922	0.0648194	0.0194838	0.0161765	2.00397	0.195446	4.936	2.15085	-15.311	42.132	19.5885
Elevated	FP11B	Whole plant	11	6	1433.6	701.068	243.779	115.88	15499.9	3143.04	21164.1	430436	0.14336	0.0701068	0.0243779	0.011588	1.54999	0.314304	4.577	2.11641	-15.714	43.0436	20.338
Control	FP12A	Whole plant	12	6	1203.6	531.786	242.677	145.648	13719	2571.67	18038.2	418049	0.12036	0.0531786	0.0242677	0.0145648	1.3719	0.257167	4.674	1.80382	-13.7	41.8049	23.1757
Control	FP12B	Whole plant	12	6	1407.45	812.965	221.248	145.786	16471.1	3299.3	22593.7	420343	0.140745	0.0812965	0.0221248	0.0145786	1.64711	0.32993	4.772	2.25937	-13.778	42.0343	18.6045
